# Supplementary material for: Understanding drug nanocarrier and blood–brain barrier interaction based on a microfluidic microphysiological model
Source: Royal Society of Chemistry journal article supplement (doi:10.1039/d2lc01077a), 2023-01-01
Supplement: d2lc01077a1.pdf [file d2lc01077a1.pdf]

a
